# Supplementary material
Source: Springer Nature journal article supplement (https://www.springermedizin.de/resource/supplementary/12969_2010_423_MOESM1_ESM.pdf/9593016)
Supplement: MOESM1 [file 9593016]

# Childhood (Ages 0–17) and Elderly (Ages ≥ 65 years) Populations as a Percentage of the US Population: 1950–2010 and Projected 2011–2050 [39]

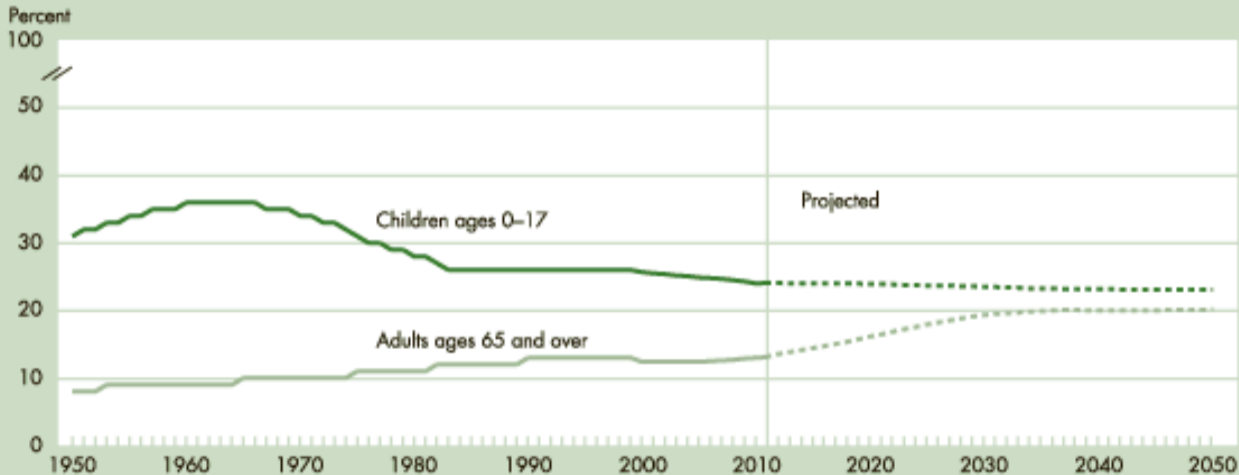

U.S. Bureau of the Census 2000.
